# Supplementary material for: N2O-Free single-pot conversion of cyclohexane to adipic acid catalysed by an iron(ii) scorpionate complex
Source: Royal Society of Chemistry journal article supplement (doi:10.1039/c6gc03208g), 2017-01-01
Supplement: c6gc03208g2.pdf [file c6gc03208g2.pdf]

## Electronic Supplementary Information for

### **N<sub>2</sub>O-free single-pot conversion of cyclohexane to adipic acid catalysed by an iron(II) scorpionate complex**

A.P.C. Ribeiro,<sup>a</sup> L.M.D.R.S. Martins,<sup>\*,a,b</sup> A.J.L. Pombeiro<sup>a</sup>

<sup>a</sup> Centro de Química Estrutural, Instituto Superior Técnico, Universidade de Lisboa, Av. Rovisco Pais, 1049-001 Lisboa, Portugal.

<sup>b</sup> Chemical Engineering Department, Instituto Superior de Engenharia de Lisboa, Instituto Politécnico de Lisboa, Rua Conselheiro Emídio Navarro, 1959-007 Lisboa, Portugal.

\*Corresponding author e-mail address: [lmartins@deq.isel.ipl.pt](mailto:lmartins@deq.isel.ipl.pt)

#### CONTENTS

|                                                                                                                                            | Page |
|--------------------------------------------------------------------------------------------------------------------------------------------|------|
| Experimental details: materials and equipment.                                                                                             | 2    |
| Experimental details: general procedure for the oxidation of cyclohexane by O <sub>3</sub> .                                               | 2    |
| <sup>1</sup> H NMR spectrum of isolated adipic acid (Figure S1).                                                                           | 3    |
| FTIR spectrum of isolated adipic acid (Figure S2).                                                                                         | 4    |
| Selected results for the solvent-, heating-, radiation- and N <sub>2</sub> O-free oxidation of cyclohexane with O <sub>3</sub> (Table S1). | 4    |
| The three major oxidative steps of the proposed reaction mechanism for the oxidation of cyclohexane with O <sub>3</sub> (Scheme S1).       | 5    |

## Experimental Details

### Materials and Equipment

All the reagents and solvents were purchased from commercial sources and used as received.  $[\text{FeCl}_2\{\kappa^3\text{-HC(pz)}_3\}]$  was prepared according to the literature [11]. The water used for all preparations and analyses was double distilled and de-ionised.

Ozone was generated by an ozone generator (Pacific Ozone, model L22) using pure oxygen gas (99%) from Air Liquide.

GC-MS analyses were performed using a Perkin Elmer Clarus 600 C instrument (Helium as the carrier gas), equipped with two capillary columns (SGE BPX5; 30 m x 0.32 mm x 25  $\mu\text{m}$ ), one having an EI-MS (electron impact) detector and the other one with a FID detector. The temperature of injection was 330  $^\circ\text{C}$ . The initial temperature (50  $^\circ\text{C}$ ) was raised at 5  $^\circ\text{C}/\text{min}$  to 330  $^\circ\text{C}$ . Reaction products were identified by comparison of their retention times with known reference compounds, and by comparing their mass spectra to fragmentation patterns obtained from the NIST spectral library stored in the computer software of the mass spectrometer.

The  $^1\text{H}$  and  $^{13}\text{C}$  NMR spectra were recorded at ambient temperature on a Bruker Advance II + 300 (UltraShield<sup>TM</sup> Magnet) spectrometer operating at 300.130 and 75.468 MHz for proton and carbon-13, respectively. The chemical shifts are reported in ppm using tetramethylsilane as an internal reference.

Infrared spectra (4000–400  $\text{cm}^{-1}$ ) were recorded on a Vertex 70 (Bruker) instrument in KBr pellets.

Elemental analyses were carried out by the Microanalytical Service of the Instituto Superior Técnico.

### General procedure for the oxidation of cyclohexane by ozone

All reactions were conducted under an ozone atmosphere using oven-dried glassware. A Schlenk flask of 35 mL capacity was charged with cyclohexane (5 mL, 46 mmol),  $[\text{FeCl}_2\{\kappa^3\text{-HC(pz)}_3\}]$  (25 - 250  $\mu\text{mol}$ , 0.05-0.5 mol% vs. cyclohexane), and equipped with a Teflon septum and a magnetic stirrer bar. In the experiments with additives,  $n(\text{additive})/n(\text{catalyst}) = 50$  of pyrazine carboxylic acid (Hpca),  $\text{HNO}_3$  or  $\text{K}_2\text{CO}_3$  was added to the reaction mixture. Ozone gas (flow rate = 0.67  $\text{g h}^{-1}$ ) was bubbled into the

cyclohexane solution for 1 - 16 h at room temperature. The reaction vessel was connected to a cold trap immersed in a 70% water-methanol bath (0 to -20 °C) to trap eventual evaporating reactants/intermediates. After 6 h, a white solid precipitates. The solid was dispersed in an ethyl acetate-hexane (20:80) solution, stirred for 30 min at room temperature, removed by filtration and dried under vacuum for 2 h at room temperature. Blank tests were performed, in a Fe-free system.

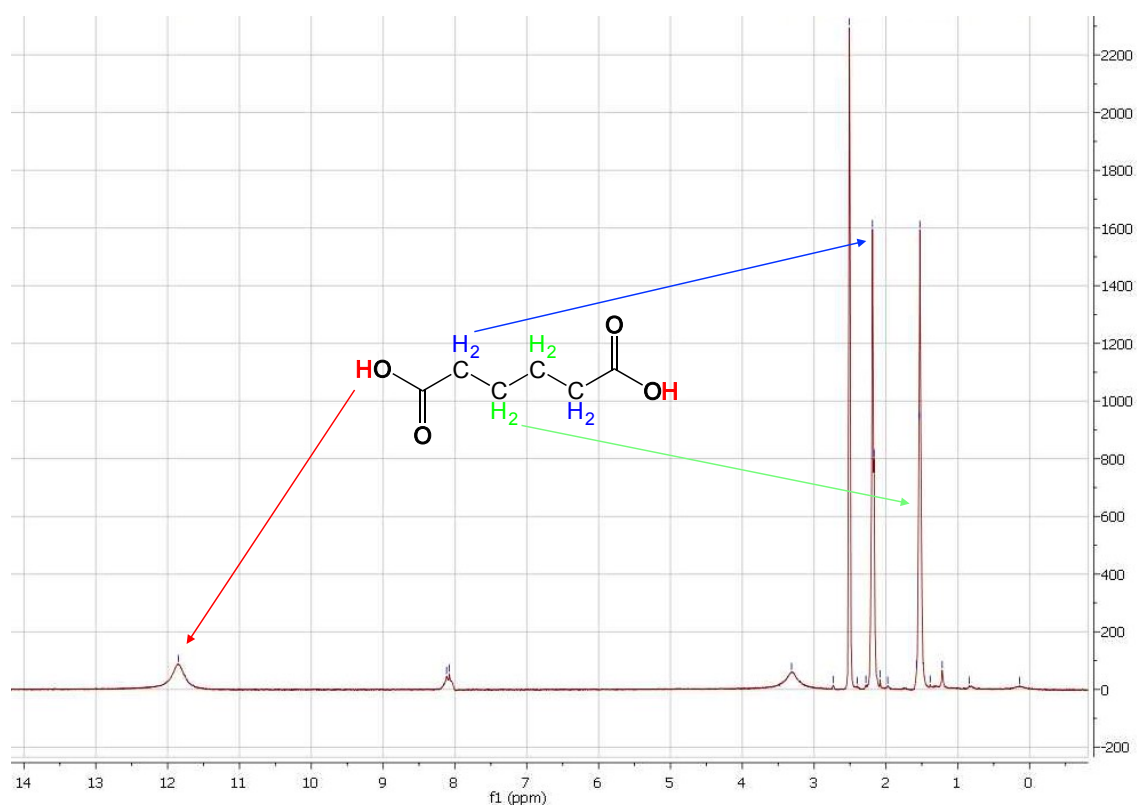

**Figure S1** -  $^1\text{H}$  NMR spectrum of isolated adipic acid in DMSO.

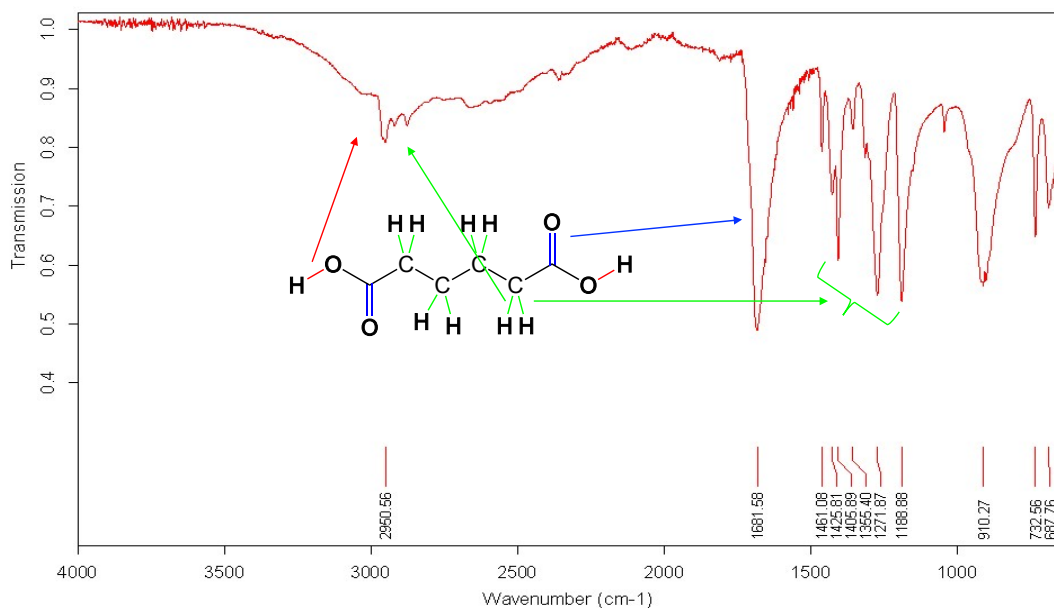

**Figure S2** - FTIR spectrum of isolated adipic acid in KBr pellet.

**Table S1** - Solvent-, heating-, radiation- and N<sub>2</sub>O-free oxidation of cyclohexane with O<sub>3</sub>.<sup>a</sup>

| Entry | Catalyst                                   | Catalyst amount /mol L <sup>-1</sup> | n(additive) / n(catalyst)           | Time /h | Conversion /% | Yield /% <sup>b</sup> |                |                       |             | Total TOF /h <sup>-1c</sup> | Mass balance <sup>d</sup> /% | Carbon efficiency <sup>e</sup> /% | Atom economy <sup>f</sup> /% |
|-------|--------------------------------------------|--------------------------------------|-------------------------------------|---------|---------------|-----------------------|----------------|-----------------------|-------------|-----------------------------|------------------------------|-----------------------------------|------------------------------|
|       |                                            |                                      |                                     |         |               | Cyclo-hexanol         | Cyclo-hexanone | Cyclo-hexane-1,2-diol | Adipic acid |                             |                              |                                   |                              |
| 1     | [FeCl <sub>2</sub> {HC(pz) <sub>3</sub> }] | 5x10 <sup>-3</sup>                   | 0                                   | 6       | 20            | 0.0                   | 3.0            | 2.4                   | 14.6        | 61                          | 88                           | 14.6                              | 81.1                         |
| 2     |                                            |                                      |                                     | 16      | 29            | 0.0                   | 1.5            | 6.4                   | 21.2        | 33                          | 85                           | 21.2                              | 81.1                         |
| 3     |                                            |                                      | Hpca, 50                            | 1       | 18            | 13.0                  | 4.9            | 0.0                   | 0.0         | 329                         | 89                           | 0.0                               | 48.0                         |
| 4     |                                            |                                      |                                     | 1.5     | 28            | 18.6                  | 8.7            | 0.0                   | 0.4         | 340                         | 88                           | 0.4                               | 48.0                         |
| 5     |                                            |                                      |                                     | 3       | 47            | 30                    | 16.5           | 0.0                   | 0.7         | 298                         | 90                           | 0.7                               | 48.0                         |
| 6     |                                            |                                      |                                     | 4       | 58            | 24.3                  | 13.4           | 1.2                   | 18.7        | 265                         | 90                           | 18.7                              | 48.0                         |
| 7     |                                            |                                      |                                     | 5       | 78            | 14.7                  | 6.1            | 1.7                   | 55.2        | 286                         | 91                           | 55.2                              | 48.0                         |
| 8     |                                            |                                      |                                     | 6       | 98            | 0.0                   | 0.0            | 2.0                   | 96.0        | 301                         | 98                           | 96.0                              | 48.0                         |
| 9     |                                            |                                      | HNO <sub>3</sub> , 50               | 6       | 50            | 0.0                   | 0.5            | 0.0                   | 49.5        | 153                         | 90                           | 49.5                              | 60.1                         |
| 10    |                                            |                                      | K <sub>2</sub> CO <sub>3</sub> , 50 | 6       | 32            | 0.0                   | 1.0            | 0.0                   | 31.0        | 98                          | 91                           | 31.0                              | 45.9                         |
| 11    |                                            | 5x10 <sup>-2</sup>                   | 0                                   | 6       | 83            | 0.0                   | 0.0            | 2.5                   | 80.5        | 25                          | 95                           | 80.5                              | 81.1                         |
| 12    |                                            |                                      | Hpca, 50                            | 6       | 88            | 0.0                   | 0.0            | 1.8                   | 86.2        | 27                          | 90                           | 86.2                              | 48.0                         |
| 13    | —                                          | —                                    | 0                                   | 6       | 15            | 3.1                   | 9.0            | 0.0                   | 2.9         | —                           | 84                           | 2.9                               | 81.1                         |
| 14    | FeCl <sub>2</sub> ·2H <sub>2</sub> O       | 5x10 <sup>-3</sup>                   | 0                                   | 6       | 13            | 9.8                   | 3.3            | 0.0                   | 0.0         | 40                          | 83                           | 0.0                               | 81.1                         |
| 15    |                                            |                                      | Hpca, 50                            | 6       | 27            | 12.8                  | 1.42           | 0.0                   | 0.0         | 44                          | 84                           | 0.0                               | 48.0                         |
| 16    | FeCl <sub>3</sub> ·6H <sub>2</sub> O       | 5x10 <sup>-3</sup>                   | 0                                   | 6       | 12            | 8.4                   | 3.6            | 0.0                   | 0.0         | 113                         | 82                           | 0.0                               | 81.1                         |
| 17    |                                            |                                      | Hpca, 50                            | 6       | 21            | 9.0                   | 12.0           | 0.0                   | 0.0         | 196                         | 79                           | 0.0                               | 48.0                         |

<sup>a</sup> Reaction conditions unless stated otherwise: 46 mmol of cyclohexane, 25 – 250 μmol (0.05 – 0.5 mol% vs. cyclohexane) of [FeCl<sub>2</sub>{κ<sup>3</sup>-HC(pz)<sub>3</sub>}], ozone (flow rate = 0.67 g h<sup>-1</sup>), room temperature. <sup>b</sup> Moles of oxygenated product *per* 100 mol of cyclohexane. <sup>c</sup> Moles of oxygenated products *per* mol of [FeCl<sub>2</sub>{κ<sup>3</sup>-HC(pz)<sub>3</sub>}] *per* hour. <sup>d</sup> Sum of all products (in moles, including unreacted cyclohexane) divided by the initial mole number of cyclohexane. <sup>e</sup> Amount of carbon in adipic acid *per* total amount of carbon in reactants. <sup>f</sup> Molecular weight of adipic acid *per* combined molecular weight of starting materials.

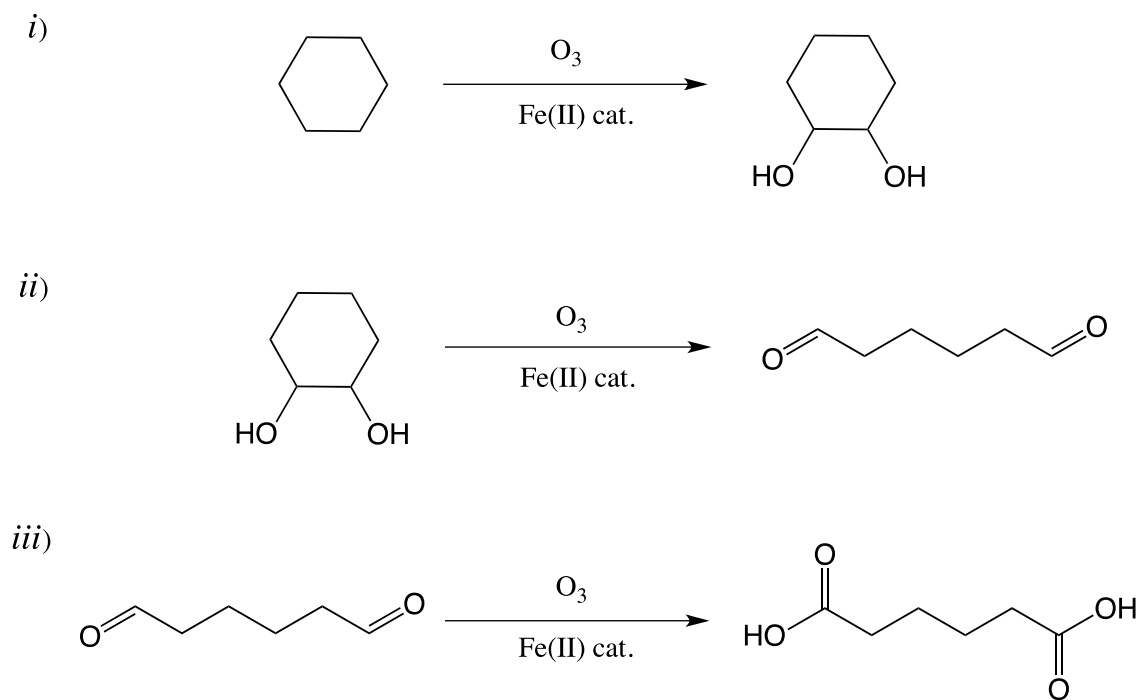

**Scheme S1** – The three major oxidative steps of the proposed reaction mechanism for the oxidation of cyclohexane with  $\text{O}_3$ .
