# Supplementary figures and images for: N2O-Free single-pot conversion of cyclohexane to adipic acid catalysed by an iron(ii) scorpionate complex
Source: Royal Society of Chemistry journal article supplement (doi:10.1039/c6gc03208g), 2017-01-01

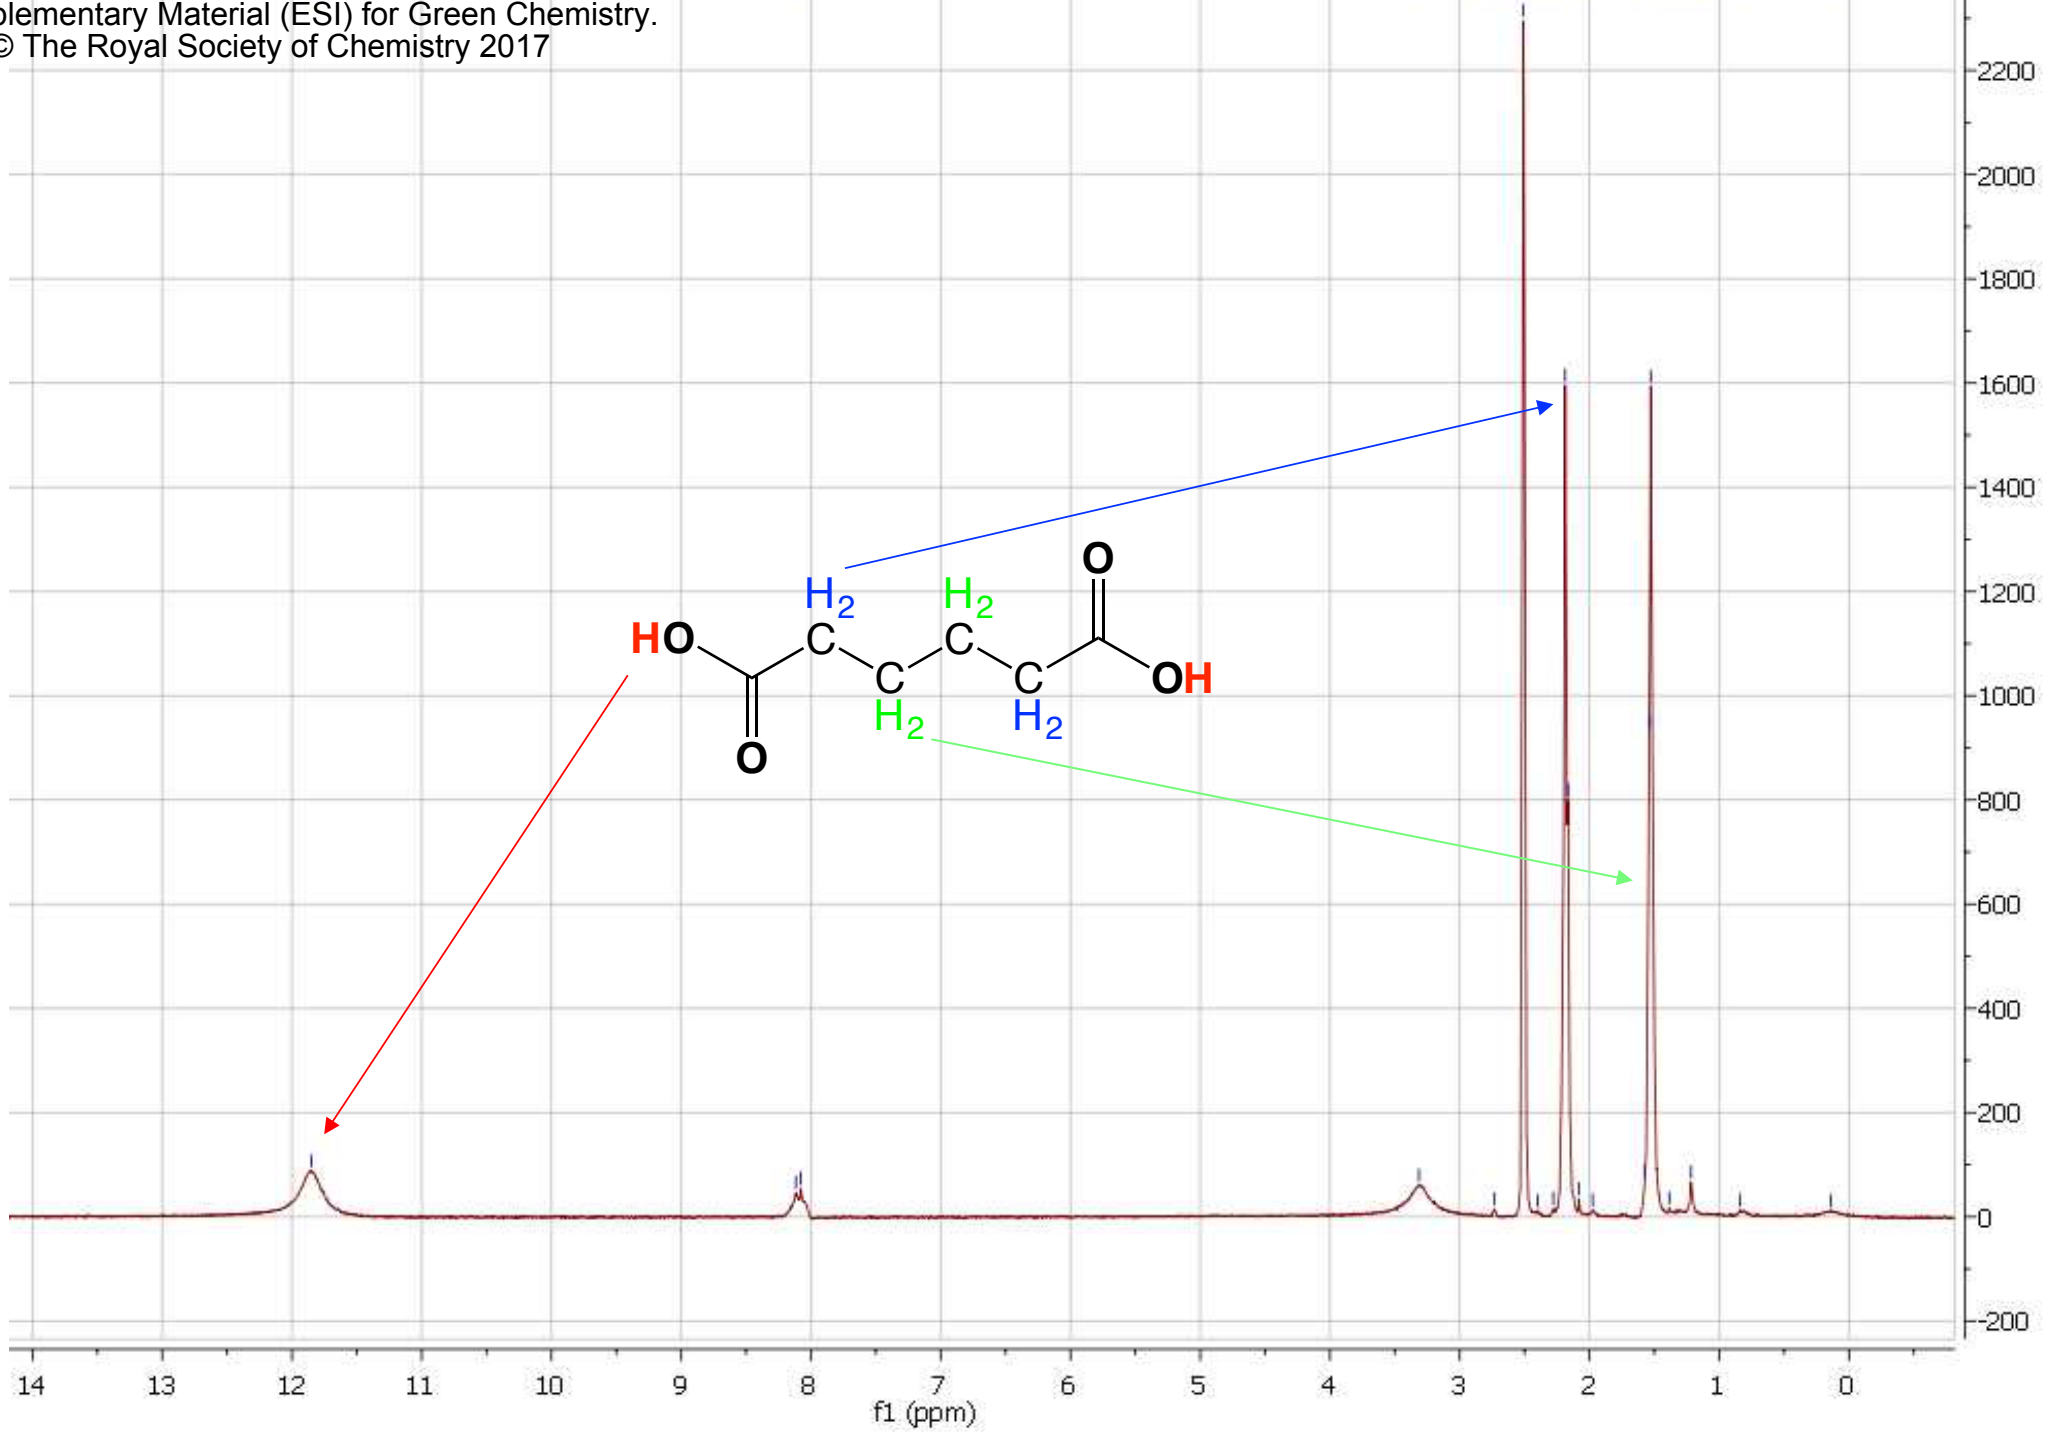

Supplement: c6gc03208g3.pdf [file c6gc03208g3.pdf]

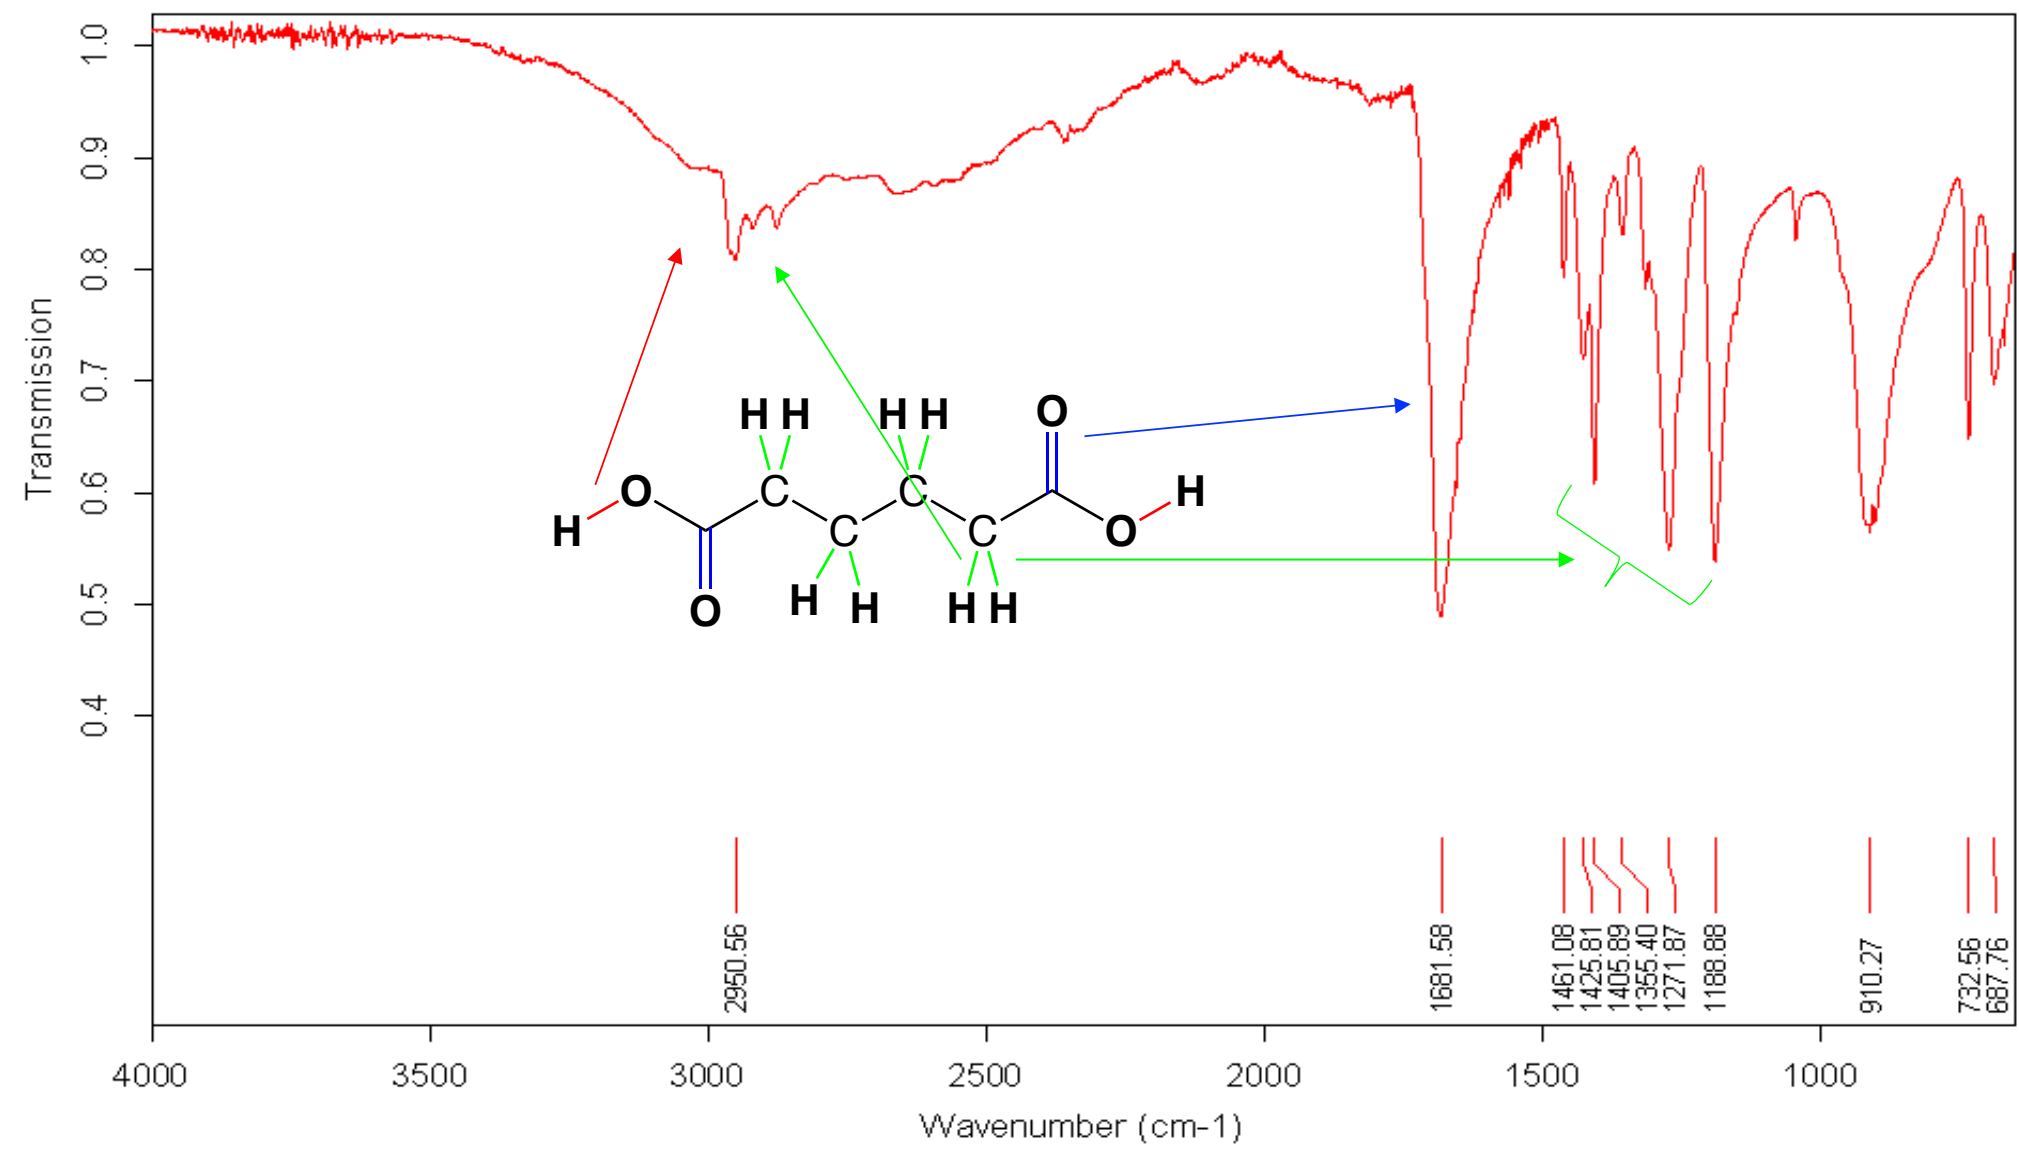

Supplement: c6gc03208g4.pdf [file c6gc03208g4.pdf]
